# Supplementary material
Source: publisher site journal article supplement (https://www.dovepress.com/get_supplementary_file.php?f=347054.docx)
Supplement: Supplementary file 1 [file get_supplementary_file.php]

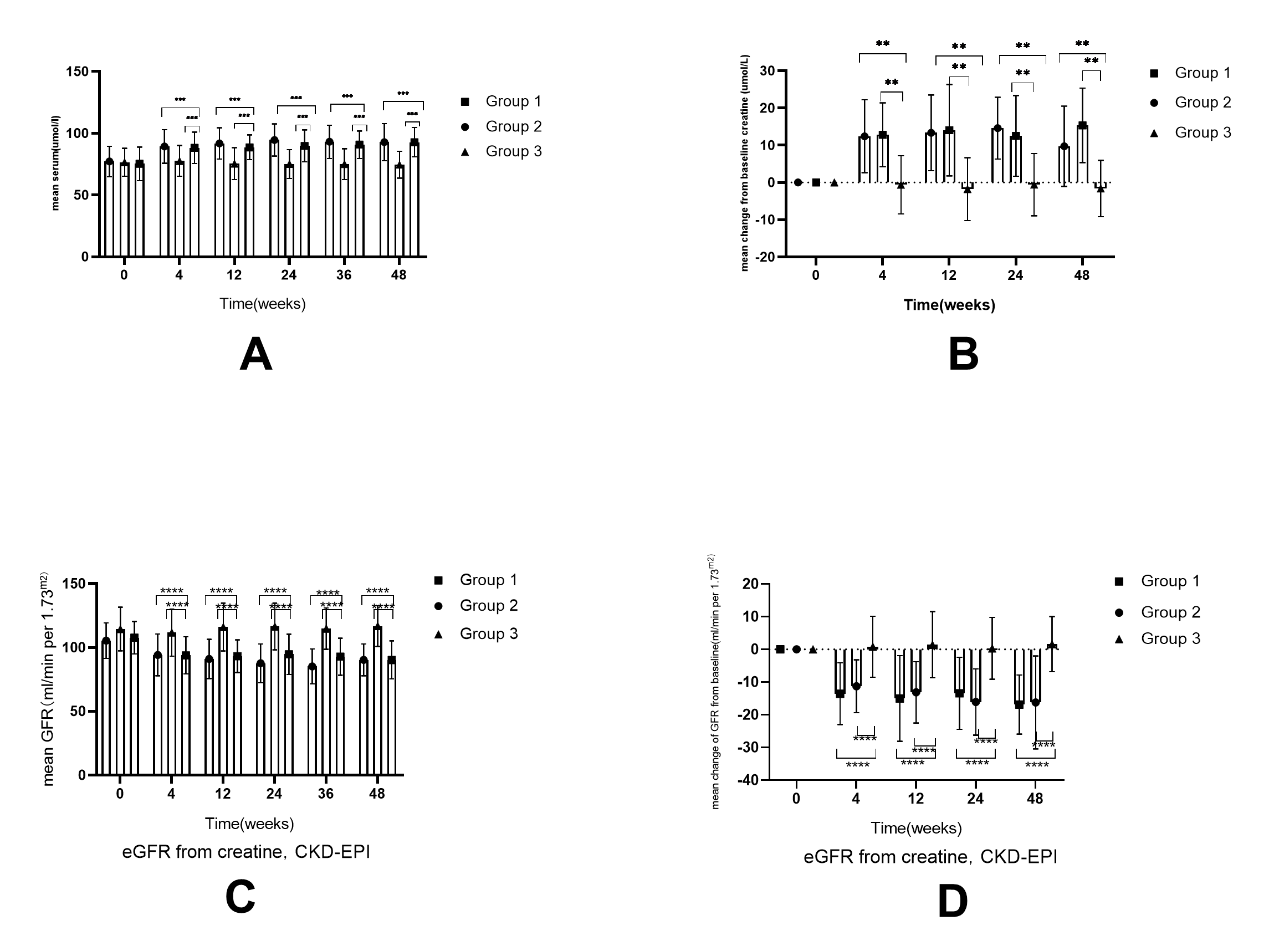


Supplementary Figure 1：The dynamic and cross-group comparison of serum creatine among three groups. (**<0.01,***<0.001; **** <0.0001; ns: not significant). Panel A and Panel C showed the mean level of serum creatine and eGFRcr among group 1(DTG+TDF containing group), group 2(DTG containing group) and group 3(control group) across 0-week till 48 week. Panel B and Panel D showed the mean change of serum creatine and eGFRcr among group 1(DTG+TDF containing group), group 2(DTG containing group) and group 3(control group) across 0-week till 48 week.


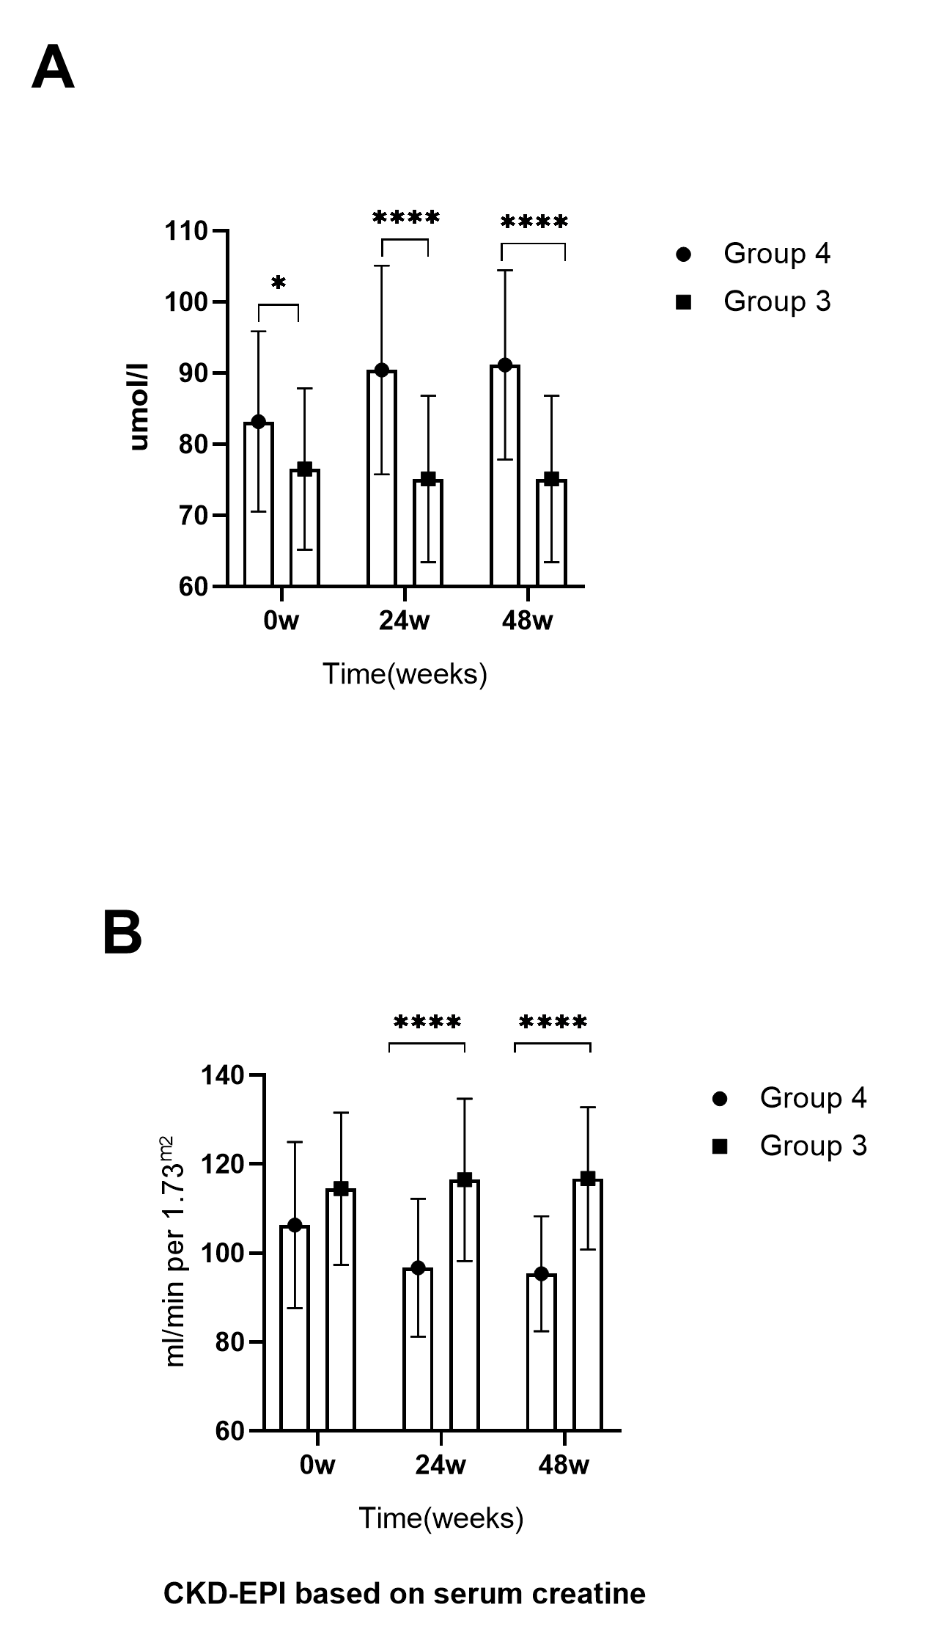


Supplementary Figure 2: The dynamic and inter-group comparison of serum creatine and GFR calculated based on serum level between switch-to DTG-containing group(group 4) and control group(group 3). (* <0.05; **** <0.0001)


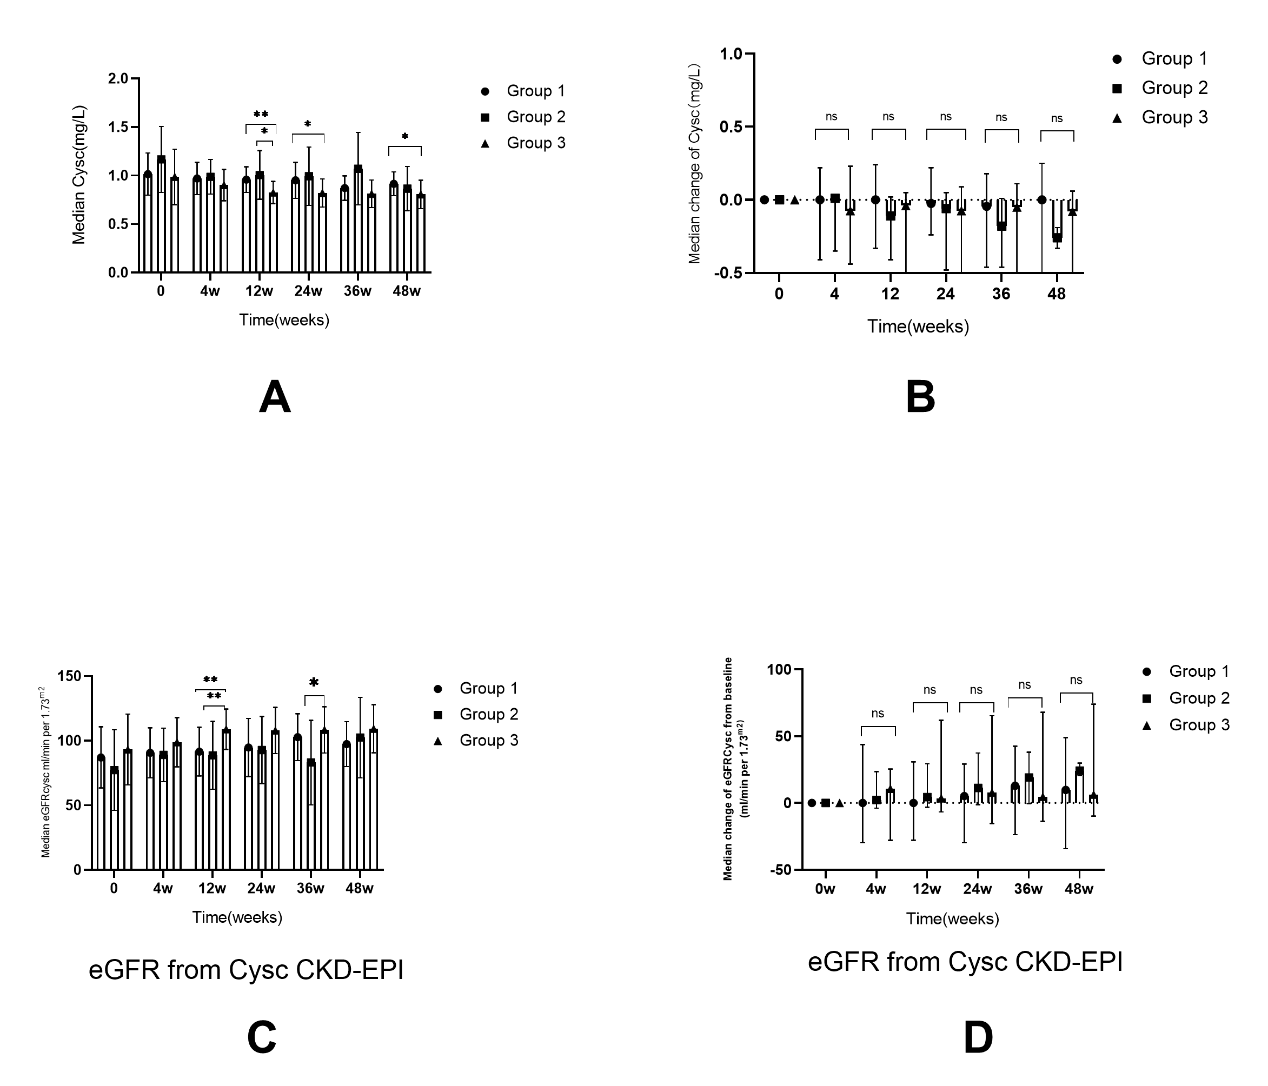


Supplementary Figure 3：The dynamic and cross-group comparison of Cystatin C and eGFRCysC among three groups. (*<0.05, **<0.01, ns: not significant) Panel A and Panel C showed the mean level of CysC and eGFRCysC among group 1(DTG+TDF containing group), group 2(DTG containing group) and group 3(control group) across 0 week till 48 week. Panel B and Panel D showed the median change of serum creatine and eGFRcr among group 1(DTG+TDF containing group), group 2(DTG containing group) and group 3(control group) across 0-week till 48 week.)


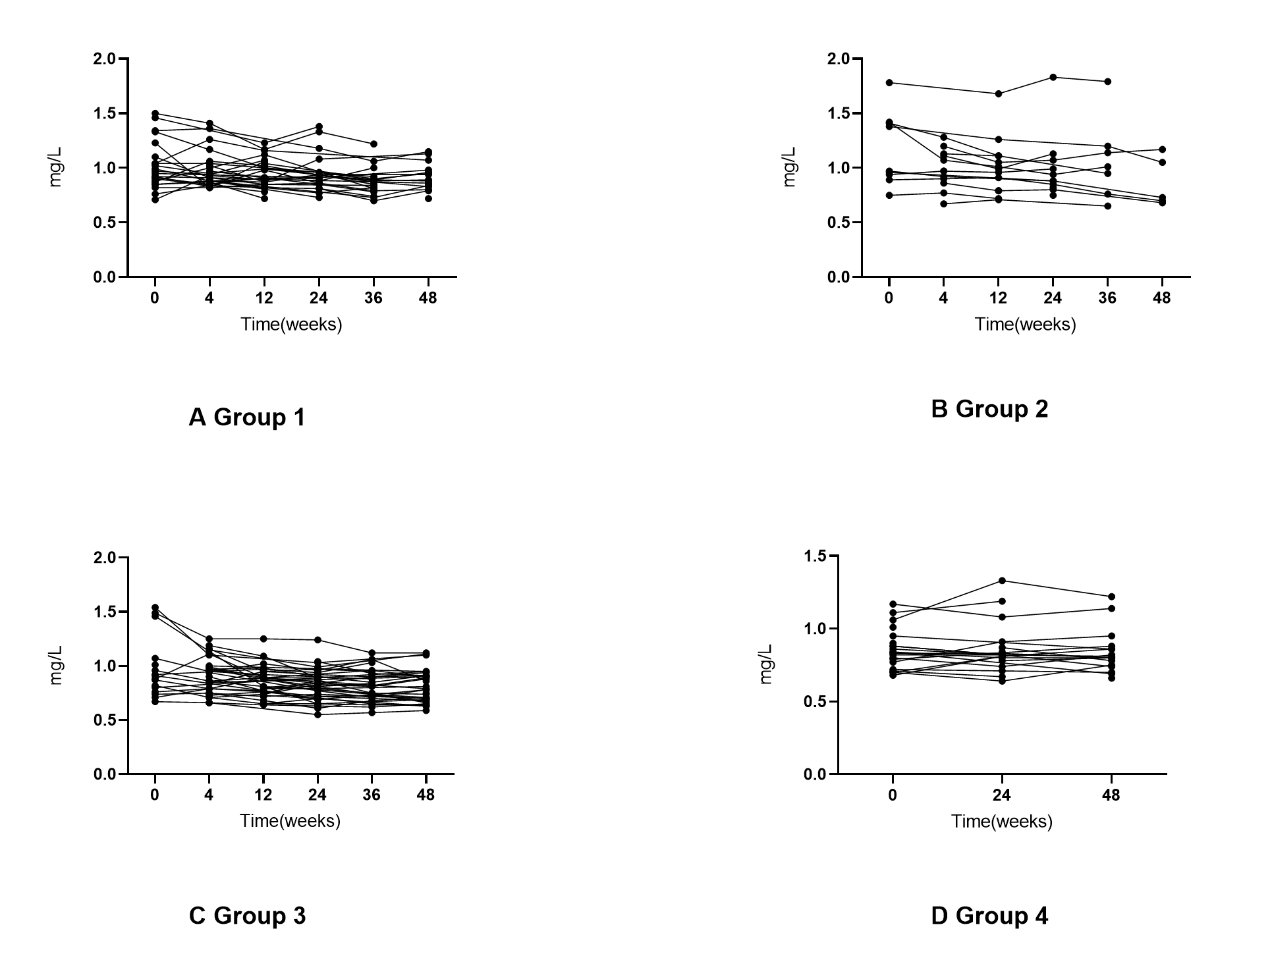


Supplementary Figure 4: The personal dynamic of cystatin C in four groups. Panel A、B、C、D showed the level of cystatin C of individuals among group 1(DTG+TDF containing group), group 2(DTG containing group), group 3(control group) and group 4(switch-to DTG group) across 0-week till 48 week.
